# Supplementary material for: Characteristics and Outcomes of Very Elderly Patients Admitted to Intensive Care: A Retrospective Multicenter Cohort Analysis*
Source: PubMed Central journal article supplement — Crit Care Med. 2023 May 23;51(10):1328–38. doi: 10.1097/CCM.0000000000005943 (PMC10497207; doi:10.1097/ccm.0000000000005943), 2023-05-23
Supplement: ccm-51-1328-s001.pdf [file ccm-51-1328-s001.pdf]

**Supplementary table 1: Characteristics of participating ICUs**

|                                                                                | <b>Rural/regional ICUs</b> | <b>Metropolitan ICUs</b> | <b>Tertiary ICUs</b>  | <b>Private ICUs</b>   | <b>All ICUs</b>       |
|--------------------------------------------------------------------------------|----------------------------|--------------------------|-----------------------|-----------------------|-----------------------|
| <b>Number of ICUs</b>                                                          | 45                         | 38                       | 40                    | 71                    | 194                   |
| <b>Number of patients per ICU</b>                                              | 4478 (2673 - 6884)         | 6341 (4181 - 8703)       | 16631 (11571 - 23271) | 4396 (1449 - 9781)    | 6341 (3255 - 11327)   |
| <b>Proportion of patients aged ≥ 80 years</b>                                  | 17.5% (14.1% - 19.7%)      | 15.3% (11.4% - 18.1%)    | 10.2% (8.5% - 13.4%)  | 18.8% (15.5% - 25%)   | 16.6% (11% - 20.2%)   |
| <b>Proportion ventilated per ICU</b>                                           | 20.1% (11.9% - 23.7%)      | 27.5% (17.9% - 39.9%)    | 54.5% (42.1% - 67.9%) | 15.2% (6.6% - 30.7%)  | 23.3% (12.4% - 42.2%) |
| <b>Proportion of all elective surgical admissions per ICU</b>                  | 20.3% (10% - 27.5%)        | 18.9% (13.2% - 25.7%)    | 38% (27.8% - 46%)     | 78.1% (63.9% - 89.3%) | 38% (20% - 68.9%)     |
| <b>Proportion of elective surgical (non-cardiothoracic) admissions per ICU</b> | 20.3% (10% - 27.5%)        | 18.9% (13.2% - 25.7%)    | 22.4% (12.4% - 27.4%) | 61.6% (47.4% - 76.8%) | 27.4% (15.8% - 53.1%) |
| <b>Proportion of elective cardiothoracic admissions per ICU</b>                | 0% (0% - 0%)               | 0% (0% - 0%)             | 16% (4.6% - 25.4%)    | 5.8% (0% - 22%)       | 0% (0% - 15.1%)       |
| <b>Proportion of emergency surgical admissions per ICU</b>                     | 16.7% (11.8% - 20.7%)      | 16.7% (12.2% - 19.8%)    | 33.2% (28.1% - 41.5%) | 19.4% (10.7% - 30%)   | 19.3% (13% - 29.7%)   |
| <b>Proportion of medical admissions per ICU</b>                                | 69.6% (62.5% - 75.9%)      | 68.2% (61.6% - 76.7%)    | 46.3% (41.1% - 57.7%) | 18.4% (8.5% - 26.8%)  | 49% (21.9% - 67.3%)   |
| <b>Median APACHE II score per ICU</b>                                          | 15 (13 - 16)               | 17 (15 - 19)             | 16 (15 - 17)          | 13 (11 - 14)          | 15 (13 - 16)          |
| <b>Median APACHE III score per ICU</b>                                         | 51 (45 - 54)               | 57 (49 - 60)             | 57 (53 - 59)          | 44 (39 - 50)          | 50 (44 - 56)          |
| <b>In-hospital mortality per ICU</b>                                           | 9.5% (7.5% - 10.1%)        | 10.3% (7.6% - 12.7%)     | 11.1% (8.9% - 13.2%)  | 3.4% (1.6% - 5.3%)    | 8% (4.2% - 10.9%)     |

**(median value and interquartile range for each ICU)**

**Supplementary table 2: Number of admissions and participating Intensive Care Units in database**

| <b>Year of admission</b> | <b>Total admissions and participating CUs</b> | <b>&lt;80 years</b>     | <b>≥80 years</b>      |
|--------------------------|-----------------------------------------------|-------------------------|-----------------------|
| 2006                     | 83,696 (135 ICUs)                             | 71,513 (85.4%, -)       | 12,183 (14.6%, -)     |
| 2007                     | 86,652 (133 ICUs)                             | 74,351 (85.8%, 4%)      | 12,301 (14.2%, 1%)    |
| 2008                     | 87,073 (132 ICUs)                             | 74,167 (85.2%, -0.2%)   | 12,906 (14.8%, 4.9%)  |
| 2009                     | 94,046 (140 ICUs)                             | 79,774 (84.8%, 7.6%)    | 14,272 (15.2%, 10.6%) |
| 2010                     | 103,443 (147 ICUs)                            | 87,280 (84.4%, 9.4%)    | 16,163 (15.6%, 13.2%) |
| 2011                     | 111,743 (149 ICUs)                            | 94,403 (84.5%, 8.2%)    | 17,340 (15.5%, 7.3%)  |
| 2012                     | 120,825 (153 ICUs)                            | 102,157 (84.5%, 8.2%)   | 18,668 (15.5%, 7.7%)  |
| 2013                     | 124,673 (154 ICUs)                            | 105,952 (85.0%, 3.7%)   | 18,721 (15.0%, 0.3%)  |
| 2014                     | 134,987 (159 ICUs)                            | 115,331 (85.4%, 8.9%)   | 19,656 (14.6%, 5%)    |
| 2015                     | 145,449 (164 ICUs)                            | 124,501 (85.6%, 8%)     | 20,948 (14.4%, 6.6%)  |
| 2016                     | 155,192 (164 ICUs)                            | 132,593 (85.4%, 6.5%)   | 22,599 (14.6%, 7.9%)  |
| 2017                     | 160,006 (171 ICUs)                            | 136,701 (85.4%, 3.1%)   | 23,305 (14.6%, 3.1%)  |
| 2018                     | 161,174 (174 ICUs)                            | 137,654 (85.4%, 0.7%)   | 23,520 (14.6%, 0.9%)  |
| 2006 - 2018              | 1,568,959 (194 ICUs)                          | 1,336,377 (85.2%, 7.1%) | 232,582 (14.8%, 7.2%) |

Number of ICU admissions each year in both cohorts presented as [n, (%), % change from previous year]

115 (59%) sites contributed data every year and accounted for 1,312,320 (83.6%) of the total patients in the study.

**P = 0.55, for change in proportion of elderly patients over time.**

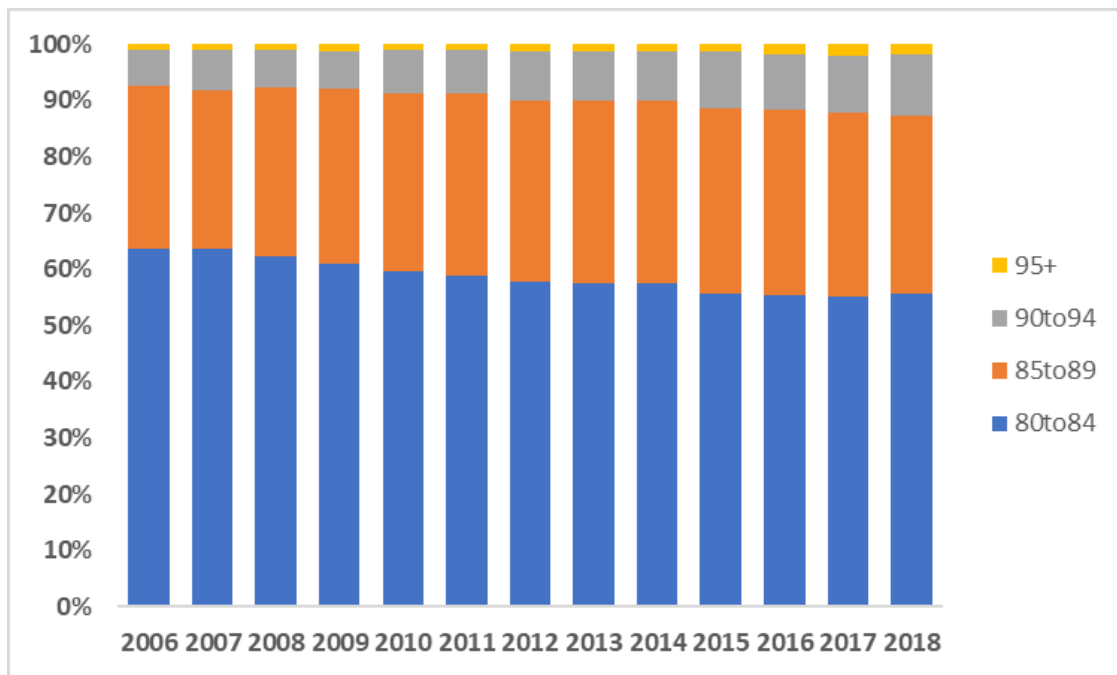

**Supplementary figure 1: Annual admission demographic trends of the very elderly age subgroups across the study period**

**Supplementary table 3: Multivariable logistic regression model for hospital mortality**

| <b>All patients</b>                                        | <b>Odds ratio (95% CI)</b> | <b>p value</b> |
|------------------------------------------------------------|----------------------------|----------------|
| Male sex                                                   | 1.022 (1.007 - 1.036)      | 0.003          |
| ANZROD                                                     | 1.073 (1.073 - 1.074)      | <0.001         |
| <b>Hospital classification</b>                             |                            |                |
| Rural/regional                                             | (reference)                |                |
| Metropolitan                                               | 1.078 (0.937 - 1.24)       | 0.3            |
| Tertiary                                                   | 1.146 (0.998 - 1.315)      | 0.05           |
| Private                                                    | 0.577 (0.508 - 0.657)      | <0.001         |
| <b>Region</b>                                              |                            |                |
| Australian Capital Territory                               | (reference)                |                |
| New South Wales                                            | 1.285 (0.919 - 1.799)      | 0.14           |
| Northern Territory                                         | 1.164 (0.673 - 2.013)      | 0.59           |
| New Zealand                                                | 1.488 (1.037 - 2.133)      | 0.031          |
| Queensland                                                 | 1.355 (0.964 - 1.905)      | 0.08           |
| South Australia                                            | 1.430 (0.987 - 2.072)      | 0.06           |
| Tasmania                                                   | 1.516 (0.978 - 2.349)      | 0.06           |
| Victoria                                                   | 1.388 (0.989 - 1.948)      | 0.06           |
| Western Australia                                          | 1.331 (0.921 - 1.924)      | 0.13           |
| <b>ICU admission date (continuous - reported per year)</b> | 0.962 (0.960 - 0.964)      | <0.001         |
| <b>Age ≥ 80 years</b>                                      | 6.995 (5.525 - 8.857)      | <0.001         |
| <b>Interaction: age ≥ 80 # ICU admission date</b>          | 0.973 (0.969 - 0.977)      | <0.001         |

**Area under receiver operating characteristic curve = 0.900**  
**Brier score = 0.055**

Logistic regression analysis for in-hospital mortality (dependent variable); independent variables: male sex, Australian and New Zealand Risk of Death (ANZROD) mortality prediction model, hospital classification, geographical region. Date/time of ICU admission entered into the logistic regression model as a continuous variable and reported as a change in odds of death per year, with an interaction term between date/time of ICU admission and age above or below 80 years of age.

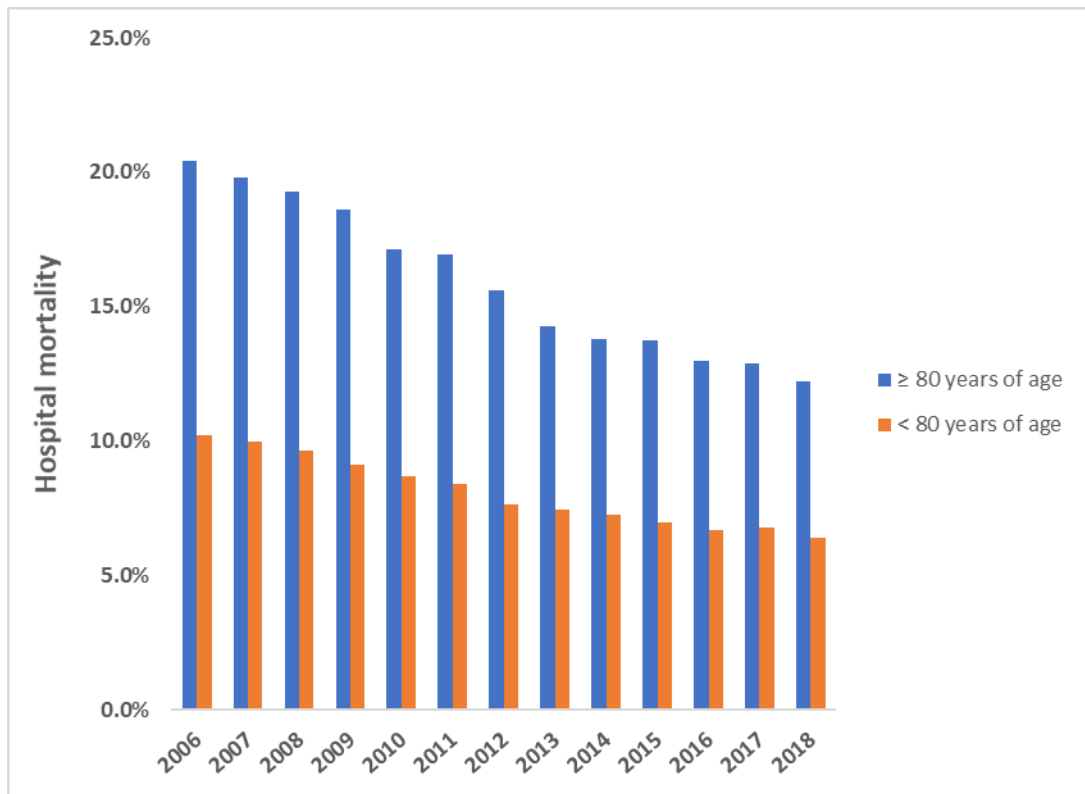

**Supplementary figure 2: Comparative raw hospital mortality over time**

**P value for difference in slopes between groups <0.001**

**Supplementary Table 4 – Summary of models examining adjusted mortality outcomes over time, the interaction between age ≥ 80 years and time, and model performance characteristics**

| <b>Multivariable mixed effects logistic regression models</b>                                      |                       | <b>p value</b> |
|----------------------------------------------------------------------------------------------------|-----------------------|----------------|
| <b>All patient types (all ages) – see supp. Table 3</b>                                            |                       |                |
| ICU admission date (reported as change per year), OR (95%CI)                                       | 0.962 (0.960 - 0.964) | <0.001         |
| Age ≥ 80 years, OR (95%CI)                                                                         | 6.995 (5.525 - 8.857) | <0.001         |
| Interaction: age ≥ 80 # ICU admission date, OR (95%CI)                                             | 0.973 (0.969 - 0.977) | <0.001         |
| Relative mortality risk-reduction per year (95%CI)                                                 | 3.9% (3.7%% to 4.2%)  |                |
| Patient illness severity risk-adjustment method                                                    | ANZROD                |                |
| Area under receiver operating characteristic (brier score)                                         | 0.900 (0.055)         |                |
| <b>All patient types (age ≥ 80 years)</b>                                                          |                       |                |
| ICU admission date (reported as change per year), OR (95%CI)                                       | 0.940 (0.937 - 0.944) | <0.001         |
| Equivalent relative mortality risk-reduction per year                                              | 6.3% (5.9% to 6.7%)   |                |
| Patient illness severity risk-adjustment method                                                    | ANZROD                |                |
| Area under receiver operating characteristic (brier score)                                         | 0.892 (0.048)         |                |
| <b>All patient types (age &lt; 80 years)</b>                                                       |                       |                |
| ICU admission date (reported as change per year), OR (95%CI)                                       | 0.962 (0.96 - 0.964)  | <0.001         |
| Relative mortality risk-reduction per year (95%CI)                                                 | 4.0% (3.7% to 4.2%)   |                |
| Patient illness severity risk-adjustment method                                                    | ANZROD                |                |
| Area under receiver operating characteristic (brier score)                                         | 0.900 (0.055)         |                |
| <b>All patient types (all ages)</b>                                                                |                       |                |
| ICU admission date (reported as change per year), OR (95%CI)                                       | 0.971 (0.969 - 0.974) | <0.001         |
| Age 80 and over, OR (95%CI)                                                                        | 6.762 (5.361 - 8.529) | <0.001         |
| Interaction: age over 80 # ICU admission date, OR (95%CI)                                          | 0.977 (0.973 - 0.982) | <0.001         |
| Relative mortality risk-reduction per year (95%CI)                                                 | 2.9% (2.7% to 3.2%)   |                |
| Patient illness severity risk-adjustment method                                                    | Individual variables* |                |
| Area under receiver operating characteristic (brier score)                                         | 0.912 (0.054)         |                |
| <b>Elective surgical patients (all ages) i.e. planned admissions to ICU after elective surgery</b> |                       |                |
| ICU admission date (reported as change per year), OR (95%CI)                                       | 0.949 (0.943 - 0.955) | <0.001         |
| Age ≥ 80 years, OR (95%CI)                                                                         | 2.657 (1.493 - 4.728) | 0.001          |
| Interaction: age ≥ 80 # ICU admission date, OR (95%CI)                                             | 0.996 (0.985 - 1.007) | 0.45           |
| Relative mortality risk-reduction per year (95%CI)                                                 | 5.4%% (4.8%% to 6.1%) |                |
| Patient illness severity risk-adjustment method                                                    | ANZROD                |                |
| Area under receiver operating characteristic (brier score)                                         | 0.904 (0.058)         |                |
| <b>Emergency surgical and medical patients (all ages) i.e. unplanned admissions</b>                |                       |                |
| ICU admission date (reported as change per year), OR (95%CI)                                       | 0.962 (0.960 - 0.965) | <0.001         |
| Age ≥ 80 years, OR (95%CI)                                                                         | 7.211 (5.560 - 9.352) | <0.001         |
| Interaction: age ≥ 80 # ICU admission date, OR (95%CI)                                             | 0.971 (0.966 - 0.976) | <0.001         |
| Relative mortality risk-reduction per year (95%CI)                                                 | 4.0% (3.7%% to 4.1%)  |                |
| Patient illness severity risk-adjustment method                                                    | ANZROD                |                |
| Area under receiver operating characteristic (brier score)                                         | 0.899 (0.055)         |                |
| <b>Emergency surgical and medical patients (≥ 80 years) i.e. unplanned admissions</b>              |                       |                |
| ICU admission date (reported as change per year), OR (95%CI)                                       | 0.939 (0.935 - 0.943) | <0.001         |
| Relative mortality risk-reduction per year (95%CI)                                                 | 6.5%% (6.0%% to 6.9%) |                |
| Patient illness severity risk-adjustment method                                                    | ANZROD                |                |
| Area under receiver operating characteristic (brier score)                                         | 0.889 (0.044)         |                |
| <b>Emergency surgical and medical patients (&lt; 80 years) i.e. unplanned admissions</b>           |                       |                |
| ICU admission date (reported as change per year), OR (95%CI)                                       | 0.962 (0.960 - 0.964) | <0.001         |
| Relative mortality risk-reduction per year (95%CI)                                                 | 3.9% (3.7% to 4.2%)   |                |
| Patient illness severity risk-adjustment method                                                    | ANZROD                |                |
| Area under receiver operating characteristic (brier score)                                         | 0.898 (0.052)         |                |

All models were adjusted for type of hospital, geographical region with site considered as a random effect. \* Model also adjusted for sex, diagnosis, treatment limitation at admission to ICU, individual physiological and biochemical variables, source of admission to hospital and to ICU, chronic co-morbidities and time in hospital prior to ICU admission and with age included only as above or below 80 years. ANZROD = Australian and New Zealand Risk Of Death mortality prediction model (which includes age as a feature); OR = adjusted odds ratio; CI = confidence interval; ICU = Intensive Care Unit

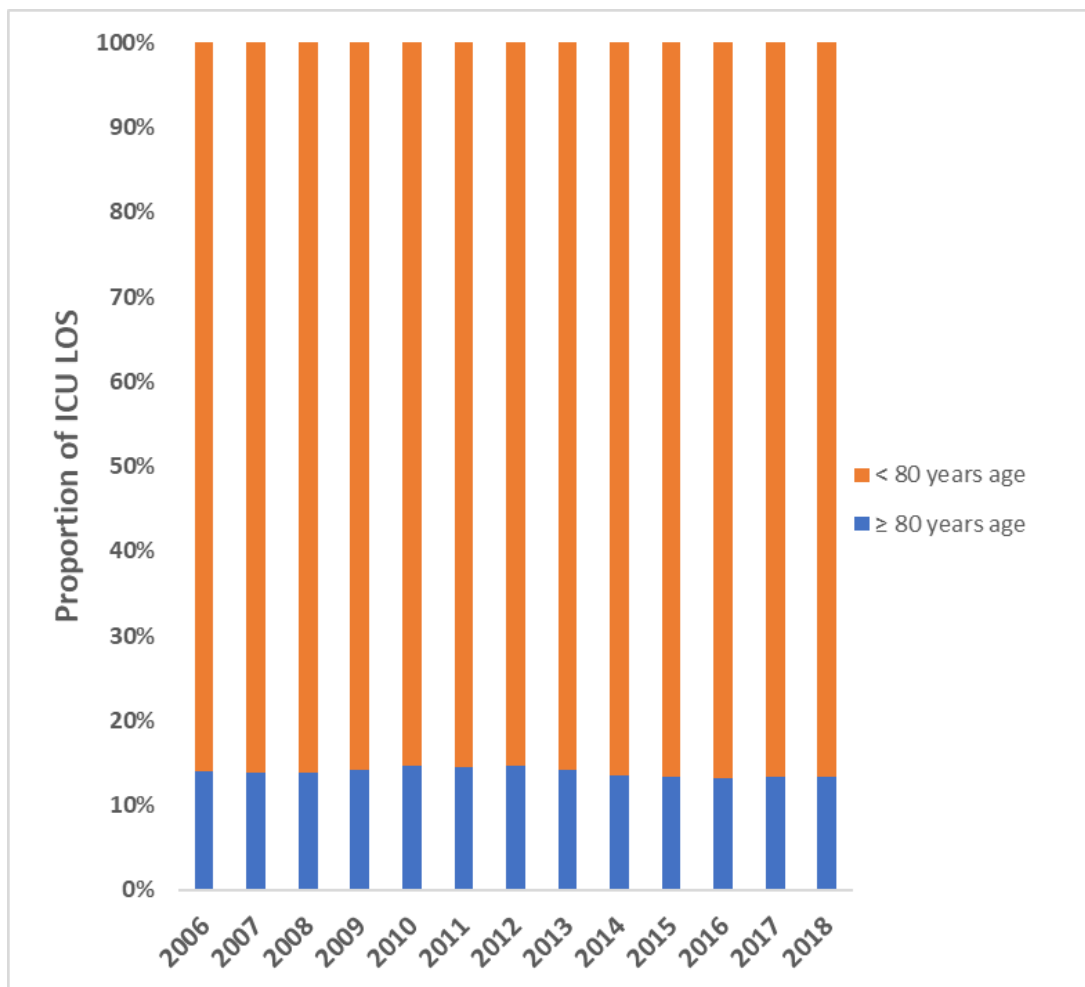

**Supplementary figure 3: Comparison of trends in proportion of sum total ICU days over the study period**

LOS: length of stay

**P value for difference of proportion between groups over time,  $p = 0.045$**

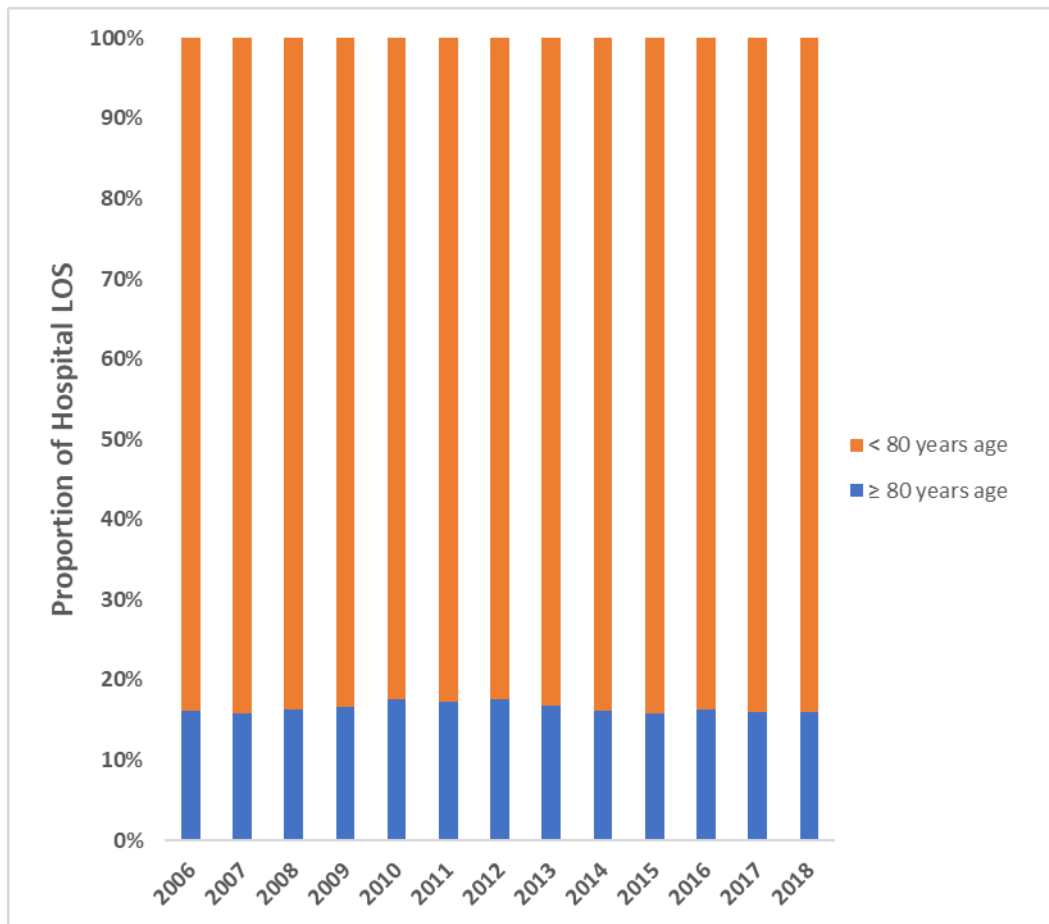

**Supplementary figure 4: Comparison of trends in proportion of sum total hospital days over the study period**

LOS: length of stay

**P value for difference of proportion between groups over time,  $p = 0.59$**



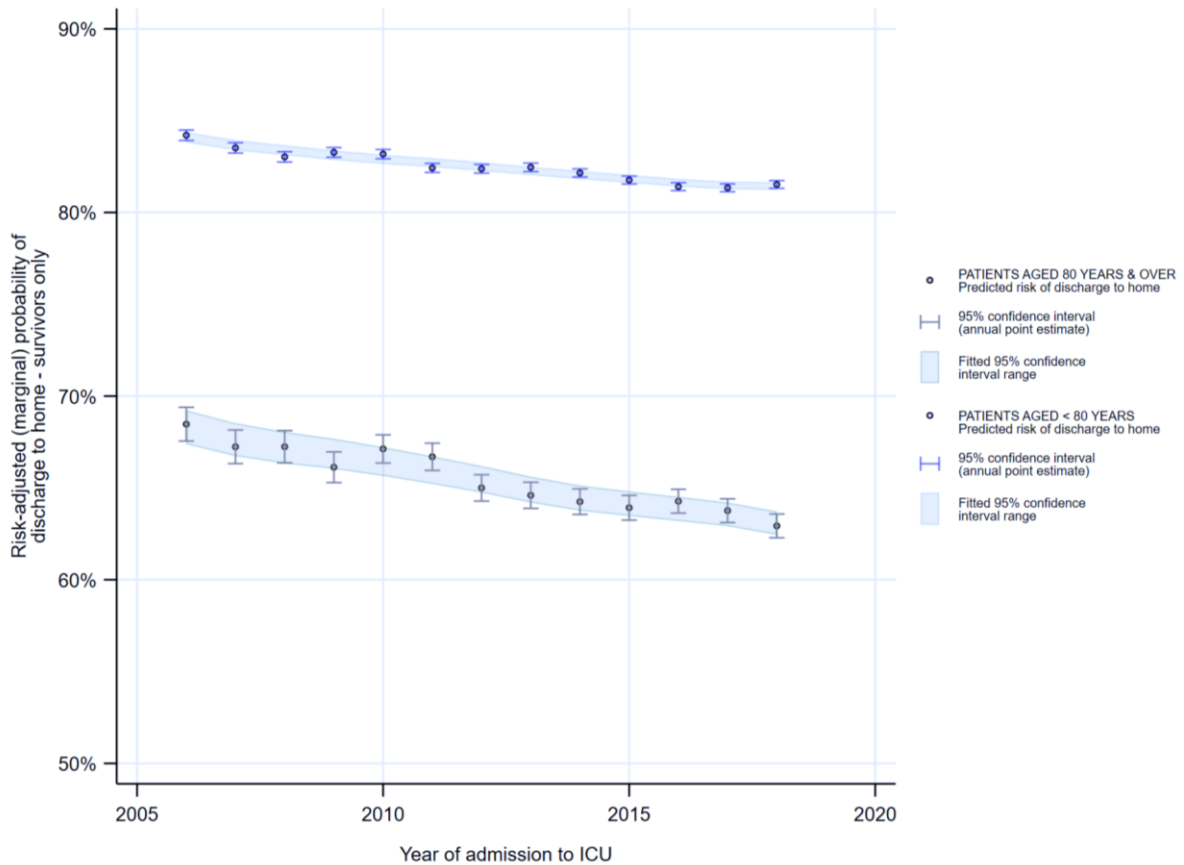

### Supplementary figure 5: Home discharges over the study period

Risk adjusted (marginal) probability for home discharge among survivors, by year of ICU admission derived from multivariable logistic regression analysis model including male sex, Australian and New Zealand Risk of Death model (ANZROD), ICU length of stay (log-hours), invasive ventilation on day one of ICU admission, hospital classification, geographical region and interaction term ( $p < 0.001$ ) between date/time of admission and age above or below 80 years)

## Supplementary table 5: Multivariable model for home discharge in survivors

### All survivors

| Survivors - Discharge Home                                 | Odds ratio (95% CI)   | p value |
|------------------------------------------------------------|-----------------------|---------|
| Male sex                                                   | 1.242 (1.231 - 1.253) | <0.001  |
| ANZROD                                                     | 0.977 (0.977 - 0.977) | <0.001  |
| Log ICU hours                                              | 0.706 (0.703 - 0.710) | <0.001  |
| Invasive ventilation day 1                                 | 0.962 (0.952 - 0.972) | <0.001  |
| <b>Hospital classification</b>                             |                       |         |
| Rural/regional                                             | (reference)           |         |
| Metropolitan                                               | 1.373 (1.351 - 1.395) | <0.001  |
| Tertiary                                                   | 0.981 (0.968 - 0.995) | 0.007   |
| Private                                                    | 1.227 (1.21 - 1.245)  | <0.001  |
| <b>Region</b>                                              |                       |         |
| Australian Capital Territory                               | (reference)           |         |
| New South Wales                                            | 0.715 (0.692 - 0.739) | <0.001  |
| Northern Territory                                         | 0.777 (0.735 - 0.822) | <0.001  |
| New Zealand                                                | 0.577 (0.556 - 0.598) | <0.001  |
| Queensland                                                 | 0.782 (0.756 - 0.809) | <0.001  |
| South Australia                                            | 0.576 (0.555 - 0.597) | <0.001  |
| Tasmania                                                   | 0.815 (0.777 - 0.855) | <0.001  |
| Victoria                                                   | 0.428 (0.414 - 0.443) | <0.001  |
| Western Australia                                          | 0.593 (0.571 - 0.615) | <0.001  |
| <b>ICU admission date (continuous - reported per year)</b> | 0.985 (0.983 - 0.986) | <0.001  |
| <b>Age 80 and over</b>                                     | 0.518 (0.441 - 0.609) | <0.001  |
| <b>Interaction: age over 80 # ICU admission date</b>       | 0.996 (0.993 - 0.999) | 0.009   |

**Area under receiver operating characteristic curve = 0.742**

**Brier score = 0.17**

Multivariable logistic regression analysis for home discharge in survivors (dependent variable); independent variables: male sex, Australian and New Zealand Risk of Death model (ANZROD), ICU length of stay (log-hours), invasive ventilation on day one of ICU admission, hospital classification, geographical region, interaction with interaction term ( $p < 0.001$ ) between date of admission and age above or below 80 years) and date/time of ICU admission entered into the model as a continuous variable reported as a change in odds of home discharge per year.

**Supplementary Table 6 – Summary of models examining discharge to home over time, the interaction between age  $\geq$  80 years and time, and model performance characteristics.**

| <b>Multivariable mixed effects logistic regression model</b> | <b>Adjusted odds ratio (95% CI)</b> | <b>p value</b> |
|--------------------------------------------------------------|-------------------------------------|----------------|
| <b>All patient types (all ages) – see suppl table 5</b>      |                                     |                |
| ICU admission date (reported as change per year)             | 0.985 (0.983 - 0.986)               | <0.001         |
| Age $\geq$ 80 years                                          | 0.520 (0.440 - 0.610)               | <0.001         |
| Interaction: age $\geq$ 80 # ICU admission date              | 0.996 (0.993 – 0.999)               | 0.009          |
| Patient illness severity risk-adjustment method              | ANZROD                              |                |
| Area under receiver operating characteristic                 | 0.742                               |                |
| Brier score                                                  | 0.170                               |                |
| <b>All patient types (age <math>\geq</math> 80 years)</b>    |                                     |                |
| ICU admission date (reported as change per year)             | 0.982 (0.980 - 0.985)               | <0.001         |
| Patient illness severity risk-adjustment method              | ANZROD                              |                |
| Area under receiver operating characteristic                 | 0.699                               |                |
| Brier score                                                  | 0.181                               |                |
| <b>All patient types (age &lt; 80 years)</b>                 |                                     |                |
| ICU admission date (reported as change per year)             | 0.984 (0.983 - 0.985)               | <0.001         |
| Patient illness severity risk-adjustment method              | ANZROD                              |                |
| Area under receiver operating characteristic                 | 0.723                               |                |
| Brier score                                                  | 0.176                               |                |

All models were adjusted for duration of ICU stay (log-days), invasive ventilation on day 1, type of hospital, geographical region with site considered as a random effect.

ANZROD = Australian and New Zealand Risk Of Death mortality prediction model (which includes age as a feature); CI = confidence interval; ICU = Intensive Care Unit

## Supplementary table 7: Multivariable model for discharge to chronic care/rehabilitation/nursing home in ICU survivors

### All survivors:

| <b>Survivors - Chronic care/rehabilitation/nursing home</b> | <b>Odds ratio (95% CI)</b> | <b>p value</b> |
|-------------------------------------------------------------|----------------------------|----------------|
| Male sex                                                    | 0.782 (0.773 - 0.791)      | <0.001         |
| ANZROD                                                      | 1.018 (1.017 - 1.018)      | <0.001         |
| Log ICU hours                                               | 1.531 (1.521 - 1.542)      | <0.001         |
| Invasive ventilation day 1                                  | 0.958 (0.945 - 0.971)      | <0.001         |
| <b>Hospital classification</b>                              |                            |                |
| Rural/regional                                              | (reference)                |                |
| Metropolitan                                                | 1.331 (1.296 - 1.367)      | <0.001         |
| Tertiary                                                    | 2.13 (2.081 - 2.179)       | <0.001         |
| Private                                                     | 3.293 (3.218 - 3.37)       | <0.001         |
| <b>Region</b>                                               |                            |                |
| Australian Capital Territory                                | (reference)                |                |
| New South Wales                                             | 2.001 (1.894 - 2.115)      | <0.001         |
| Northern Territory                                          | 0.203 (0.162 - 0.256)      | <0.001         |
| New Zealand                                                 | 2.63 (2.479 - 2.789)       | <0.001         |
| Queensland                                                  | 1.971 (1.864 - 2.085)      | <0.001         |
| South Australia                                             | 1.988 (1.876 - 2.108)      | <0.001         |
| Tasmania                                                    | 2.187 (2.036 - 2.35)       | <0.001         |
| Victoria                                                    | 4.246 (4.019 - 4.486)      | <0.001         |
| Western Australia                                           | 1.97 (1.855 - 2.092)       | <0.001         |
| <b>ICU admission date (continuous - reported per year)</b>  | 1.022 (1.02 - 1.024)       | <0.001         |
| <b>Age 80 and over</b>                                      | 1.352 (1.105 - 1.654)      | 0.003          |
| <b>Interaction: age over 80 # ICU admission date</b>        | 1.013 (1.009 - 1.017)      | <0.001         |

**Area under receiver operating characteristic curve = 0.699**

**Brier score = 0.078**

Logistic regression analysis for discharge to chronic care/rehabilitation in survivors (dependent variable); independent variables: male gender, Australia New Zealand Risk of Death (ANZROD) mortality prediction model, log ICU hours, ventilated (invasive mechanical ventilation on D1 ICU admission), hospital classification, geographical region, interaction term to test difference between those aged above or below 80 years of age. Date/time of ICU admission entered into the logistic regression model as a continuous variable and reported as a change in odds of discharge per year.

**Supplementary Table 8 – Summary of models examining discharge to chronic care/nursing home over time, the interaction between age ≥ 80 years and time, and model performance characteristics.**

| <b>Multivariable mixed effects logistic regression model</b> | <b>Adjusted odds ratio (95% CI)</b> | <b>p value</b> |
|--------------------------------------------------------------|-------------------------------------|----------------|
| <b>All patient types (all ages) – see supp table 7</b>       |                                     |                |
| ICU admission date (reported as change per year)             | 1.022 (1.020 - 1.024)               | <0.001         |
| Age ≥ 80 years                                               | 1.350 (1.110 - 1.650)               | 0.003          |
| Interaction: age ≥ 80 # ICU admission date                   | 1.013 (1.009 – 1.017)               | <0.001         |
| Patient illness severity risk-adjustment method              | ANZROD                              |                |
| Area under receiver operating characteristic                 | 0.699                               |                |
| Brier score                                                  | 0.078                               |                |
| <b>All patient types (age ≥ 80 years)</b>                    |                                     |                |
| ICU admission date (reported as change per year)             | 1.032 (1.028 - 1.035)               | <0.001         |
| Patient illness severity risk-adjustment method              | ANZROD                              |                |
| Area under receiver operating characteristic                 | 0.667                               |                |
| Brier score                                                  | 0.078                               |                |
| <b>All patient types (age &lt; 80 years)</b>                 |                                     |                |
| ICU admission date (reported as change per year)             | 1.023 (1.022 - 1.025)               | <0.001         |
| Patient illness severity risk-adjustment method              | ANZROD                              |                |
| Area under receiver operating characteristic                 | 0.667                               |                |
| Brier score                                                  | 0.078                               |                |

All models were adjusted for duration of ICU stay (log-days), invasive ventilation on day 1, type of hospital, geographical region with site considered as a random effect.

ANZROD = Australian and New Zealand Risk Of Death mortality prediction model (which includes age as a feature); CI = confidence interval; ICU = Intensive Care Unit

**The authors and the ANZICS CORE management committee would like to thank clinicians, data collectors, research coordinators and researchers at the following contributing sites:**

Albury Wodonga Health ICU

Alfred Hospital ICU

Alice Springs Hospital ICU

Allamanda Private Hospital ICU

Armadale Health Service ICU

Armidale Rural Referral Hospital ICU

Ashford Community Hospital ICU

Auckland City Hospital CV ICU

Auckland City Hospital DCCM

Austin Hospital ICU

Ballarat Health Services ICU

Bankstown-Lidcombe Hospital ICU

Bathurst Base Hospital ICU

Bendigo Health Care Group ICU

Blacktown Hospital ICU

Box Hill Hospital ICU

Brisbane Private Hospital ICU

Brisbane Waters Private Hospital ICU

Buderim Private Hospital ICU

Bunbury Regional Hospital ICU

Bundaberg Base Hospital ICU

Caboolture Hospital ICU

Cabrini Hospital ICU

Cairns Hospital ICU

Calvary Adelaide Hospital ICU

Calvary Hospital (Canberra) ICU

Calvary Hospital (Lenah Valley) ICU  
Calvary John James Hospital ICU  
Calvary Mater Newcastle ICU  
Calvary North Adelaide Hospital ICU  
Campbelltown Hospital ICU  
Canberra Hospital ICU  
Central Gippsland Health Service (Sale) ICU  
Christchurch Hospital ICU  
Coffs Harbour Health Campus ICU  
Concord Hospital (Sydney) ICU  
Dandenong Hospital ICU  
Dubbo Base Hospital ICU  
Dunedin Hospital ICU  
Epworth Eastern Private Hospital ICU  
Epworth Freemasons Hospital ICU  
Epworth Geelong ICU  
Epworth Hospital (Richmond) ICU  
Fairfield Hospital ICU  
Figtree Private Hospital ICU  
Fiona Stanley Hospital ICU  
Flinders Medical Centre ICU  
Flinders Private Hospital ICU  
Footscray Hospital ICU  
Frankston Hospital ICU  
Fremantle Hospital ICU  
Gold Coast Private Hospital ICU  
Gold Coast University Hospital ICU  
Gosford Hospital ICU  
Gosford Private Hospital ICU  
Goulburn Base Hospital ICU

Goulburn Valley Health ICU  
Grafton Base Hospital ICU  
Greenslopes Private Hospital ICU  
Griffith Base Hospital ICU  
Hawkes Bay Hospital ICU  
Hervey Bay Hospital ICU  
Hollywood Private Hospital ICU  
Holmesglen Private Hospital ICU  
Hornsby Ku-ring-gai Hospital ICU  
Hurstville Private Hospital ICU  
Hutt Hospital ICU  
Ipswich Hospital ICU  
John Fawkner Hospital ICU  
John Flynn Private Hospital ICU  
John Hunter Hospital ICU  
Joondalup Health Campus ICU  
Kareena Private Hospital ICU  
Knox Private Hospital ICU  
Latrobe Regional Hospital ICU  
Launceston General Hospital ICU  
Lismore Base Hospital ICU  
Liverpool Hospital ICU  
Logan Hospital ICU  
Lyell McEwin Hospital ICU  
Mackay Base Hospital ICU  
Macquarie University Private Hospital ICU  
Manly Hospital & Community Health ICU  
Manning Rural Referral Hospital ICU  
Maroondah Hospital ICU  
Mater Adults Hospital (Brisbane) ICU



Mater Health Services North Queensland ICU  
Mater Private Hospital (Brisbane) ICU  
Mater Private Hospital (Sydney) ICU  
Melbourne Private Hospital ICU  
Mersey Community Hospital ICU  
Middlemore Hospital ICU  
Mildura Base Public Hospital ICU  
Modbury Public Hospital ICU  
Monash Medical Centre-Clayton Campus ICU  
Mount Hospital ICU  
Mount Isa Hospital ICU  
Mulgrave Private Hospital ICU  
Nambour General Hospital ICU  
Nambour Selangor Private Hospital ICU  
National Capital Private Hospital ICU  
Nelson Hospital ICU  
Nepean Hospital ICU  
Newcastle Private Hospital ICU  
Noosa Hospital ICU  
North Shore Hospital ICU  
North Shore Private Hospital ICU  
North West Regional Hospital (Burnie) ICU  
Northeast Health Wangaratta ICU  
Norwest Private Hospital ICU  
Orange Base Hospital ICU  
Peninsula Private Hospital ICU  
Peter MacCallum Cancer Institute ICU  
Pindara Private Hospital ICU  
Port Macquarie Base Hospital ICU  
Prince of Wales Hospital (Sydney) ICU

Prince of Wales Private Hospital (Sydney) ICU  
Princess Alexandra Hospital ICU  
Queen Elizabeth II Jubilee Hospital ICU  
Redcliffe Hospital ICU  
Repatriation General Hospital (Adelaide) ICU  
Robina Hospital ICU  
Rockhampton Hospital ICU  
Rockingham General Hospital ICU  
Rotorua Hospital ICU  
Royal Adelaide Hospital ICU  
Royal Brisbane and Women's Hospital ICU  
Royal Darwin Hospital ICU  
Royal Hobart Hospital ICU  
Royal Melbourne Hospital ICU  
Royal North Shore Hospital ICU  
Royal Perth Hospital ICU  
Royal Prince Alfred Hospital ICU  
Shoalhaven Hospital ICU  
Sir Charles Gairdner Hospital ICU  
South West Healthcare (Warrnambool) ICU  
Southern Cross Hospital (Hamilton) ICU  
Southern Cross Hospital (Wellington) ICU  
St Andrew's Hospital (Adelaide) ICU  
St Andrew's Hospital Toowoomba ICU  
St Andrew's War Memorial Hospital ICU  
St George Hospital (Sydney) CICU  
St George Hospital (Sydney) ICU  
St George Hospital (Sydney) ICU2  
St George Private Hospital (Sydney) ICU  
St Georges Hospital (NZ) ICU

St John of God (Berwick) ICU  
St John Of God Health Care (Subiaco) ICU  
St John Of God Hospital (Ballarat) ICU  
St John of God Hospital (Bendigo) ICU  
St John of God Hospital (Geelong) ICU  
St John of God Hospital (Murdoch) ICU  
St John of God Midland Public & Private ICU  
St Vincent's Private Hospital Northside ICU  
St Vincent's Hospital (Melbourne) ICU  
St Vincent's Hospital (Sydney) ICU  
St Vincent's Hospital (Toowoomba) ICU  
St Vincent's Private Hospital (Sydney) ICU  
St Vincent's Private Hospital Fitzroy ICU  
Sunnybank Hospital ICU  
Sunshine Hospital ICU  
Sutherland Hospital & Community Health Services ICU  
Sydney Adventist Hospital ICU  
Sydney Southwest Private Hospital ICU  
Tamworth Base Hospital ICU  
Taranaki Health ICU  
Tauranga Hospital ICU  
The Bays Hospital ICU  
The Chris O'Brien Lifehouse ICU  
The Memorial Hospital (Adelaide) ICU  
The Northern Hospital ICU  
The Prince Charles Hospital ICU  
The Queen Elizabeth (Adelaide) ICU  
The Wesley Hospital ICU  
Timaru Hospital ICU  
Toowoomba Hospital ICU

Townsville University Hospital ICU

Tweed Heads District Hospital ICU

University Hospital Geelong ICU

Wagga Wagga Base Hospital & District Health ICU

Waikato Hospital ICU

Warringal Private Hospital ICU

Wellington Hospital ICU

Werribee Mercy Hospital ICU

Western District Health Service (Hamilton) ICU

Western Hospital (SA) ICU

Western Private Hospital ICU

Westmead Hospital ICU

Westmead Private Hospital ICU

Whangarei Area Hospital - Northland Health Ltd ICU

Wimmera Health Care Group (Horsham) ICU

Wollongong Hospital ICU

Wollongong Private Hospital ICU

Wyong Hospital ICU
